# Supplementary material
Source: publisher site journal article supplement (https://www.dovepress.com/article/488426)
Supplement: Supplementary file 1 [file get_supplementary_file.php]

Appendix 1. Semi-Structured Interview Guide:

The purpose of this study and this interview is to examine the barriers to implementing the proposed solutions to the problem of recruiting and retaining underrepresented populations in cancer clinical trials from the perspective of clinical trial research coordinating staff. Do you agree to participate in a recorded interview?

If participants agree, the recording will begin:

1. Please state your current title and describe your role/duties/responsibilities
2. What is the process of introducing new clinical trial protocols for activation on your site?
   1. What is the estimated timeline for activating a clinical trial on your site?
3. On what bases are clinical trials evaluated for feasibility?
4. Describe your experience in recruiting and retaining patients.
5. Are there unique or additional strategies and resources for the underrepresented populations?
6. Does your site have a recruitment and retention plan in place?
   1. If so, please explain the plan.
   2. Is the plan modified based on population demographics, disease groups, and protocol requirements?
7. Describe this academic center’s use of incentives, compensation, or reimbursement for patients.
8. State this academic center’s resources for non-English speaking patients.
9. Are there any informed consent forms in other languages besides English?
   1. If not available, what is the process of obtaining an informed consent form in another language?
10. What do you consider barriers to recruiting and or retaining underrepresented populations?

**Interviewees will be provided the framework for visual aid**

1. *Socioeconomic barriers: Providing patients with transportation options and reimbursement/incentives to address the socioeconomic disparity*
   1. How would you implement the proposed solutions to socioeconomic barriers listed in the framework?
   2. Do you foresee any challenges in the implementation?
2. *Mistrust & lack of knowledge or awareness: Cultural inclusivity, staff diversity, health educator interventions/patient navigation, and providing culturally appropriate materials to patients can alleviate trust and the need for knowledge and awareness of clinical trials.*
   1. How would you implement the proposed solutions to increase trust and knowledge of clinical trials or awareness?
   2. Do you foresee any challenges in the implementation?
3. *Language and communication barriers: Providing linguistically appropriate materials, having interpreters and translations available for patients, and training staff about cultural sensitivity have been shown to help recruit and retain patients in clinical trials*
   1. How would you implement proposed solutions to address language and communication barriers?
   2. Do you foresee challenges in implementing these solutions?
4. What do you consider to be the most important measure that would increase inclusivity?
5. What do you consider barriers to the proposed measure to increase inclusivity?
   1. What solutions may address this barrier?
